# Supplementary material
Source: HighWire-hosted journal article supplement (https://www.rcpjournals.org/highwire/filestream/12490/field_highwire_adjunct_files/4/Dasgupta_supplementary_material_S5.pdf)
Supplement: Dasgupta_supplementary_material_S5.pdf [file Dasgupta_supplementary_material_S5.pdf]

**WHO Performance Status classification (NICE, 2007)**

| <b>Performance Status (PS)</b> | <b>Classification Description</b>                                                                                                |
|--------------------------------|----------------------------------------------------------------------------------------------------------------------------------|
| 0                              | Normal activity level, no restrictions                                                                                           |
| 1                              | Some restriction- able to carry out light work and is mobile, but not strenuous activity                                         |
| 2                              | Mobile and self-caring in activities of daily living, but unable to perform work related activities.<br>Mobile $\geq$ 50% of day |
| 3                              | Symptomatic and spending $\geq$ 50% of the day resting, but not bedridden                                                        |
| 4                              | Disabled and confined to bed/chair; incapable of self-care or daily routine activities                                           |
